# Supplementary material
Source: Springer Nature journal article supplement (https://www.springermedizin.de/resource/supplementary/12871_2006_38_MOESM3_ESM.pdf/9429526)

A

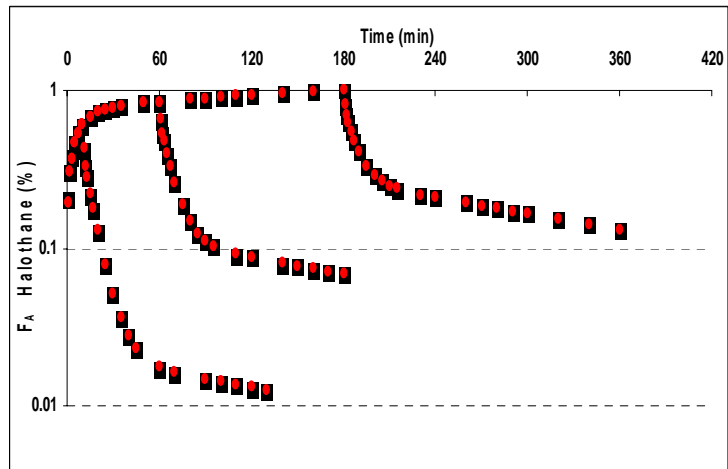

B

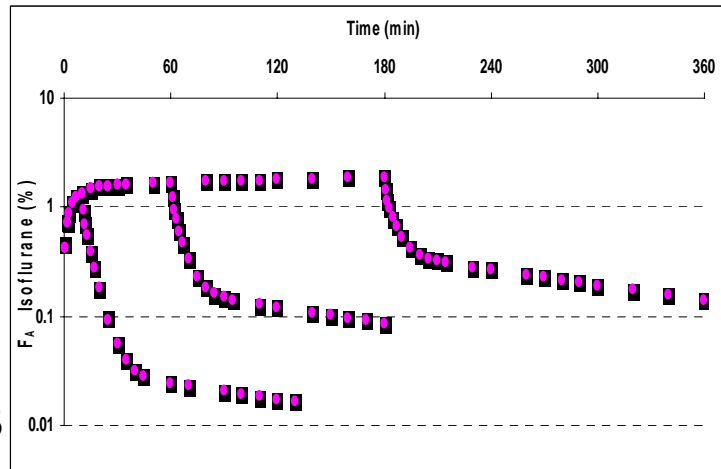

C

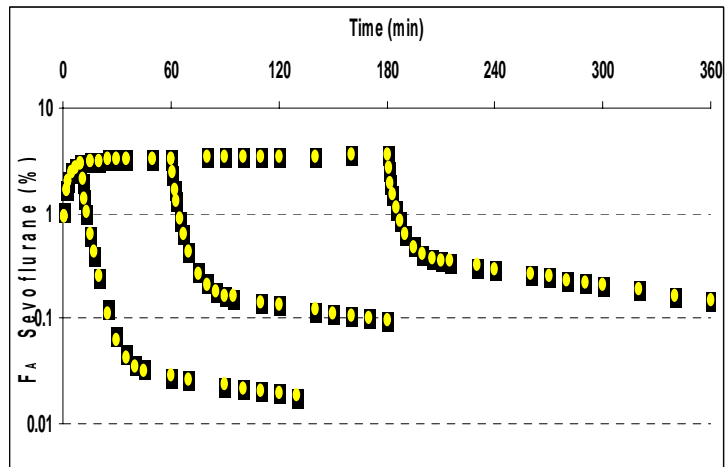

D

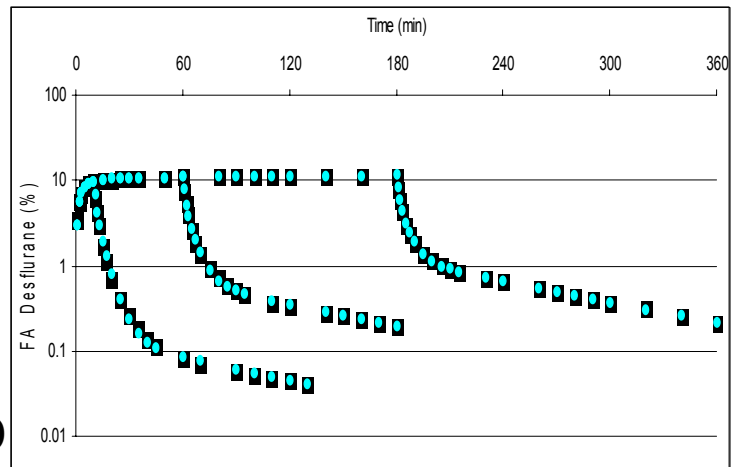

Supplement: MOESM3 [file 9429526]
